# Supplementary figures and images for: Investigation of the Effect of Therapeutic Plasma Exchange for TAFRO Syndrome: A Pilot Study
Source: MDPI journal article supplement (doi:10.3390/biomedicines12040849), 2024-04-11

**Figure S1. Change of clinical data before and after therapeutic plasma exchange procedures.**

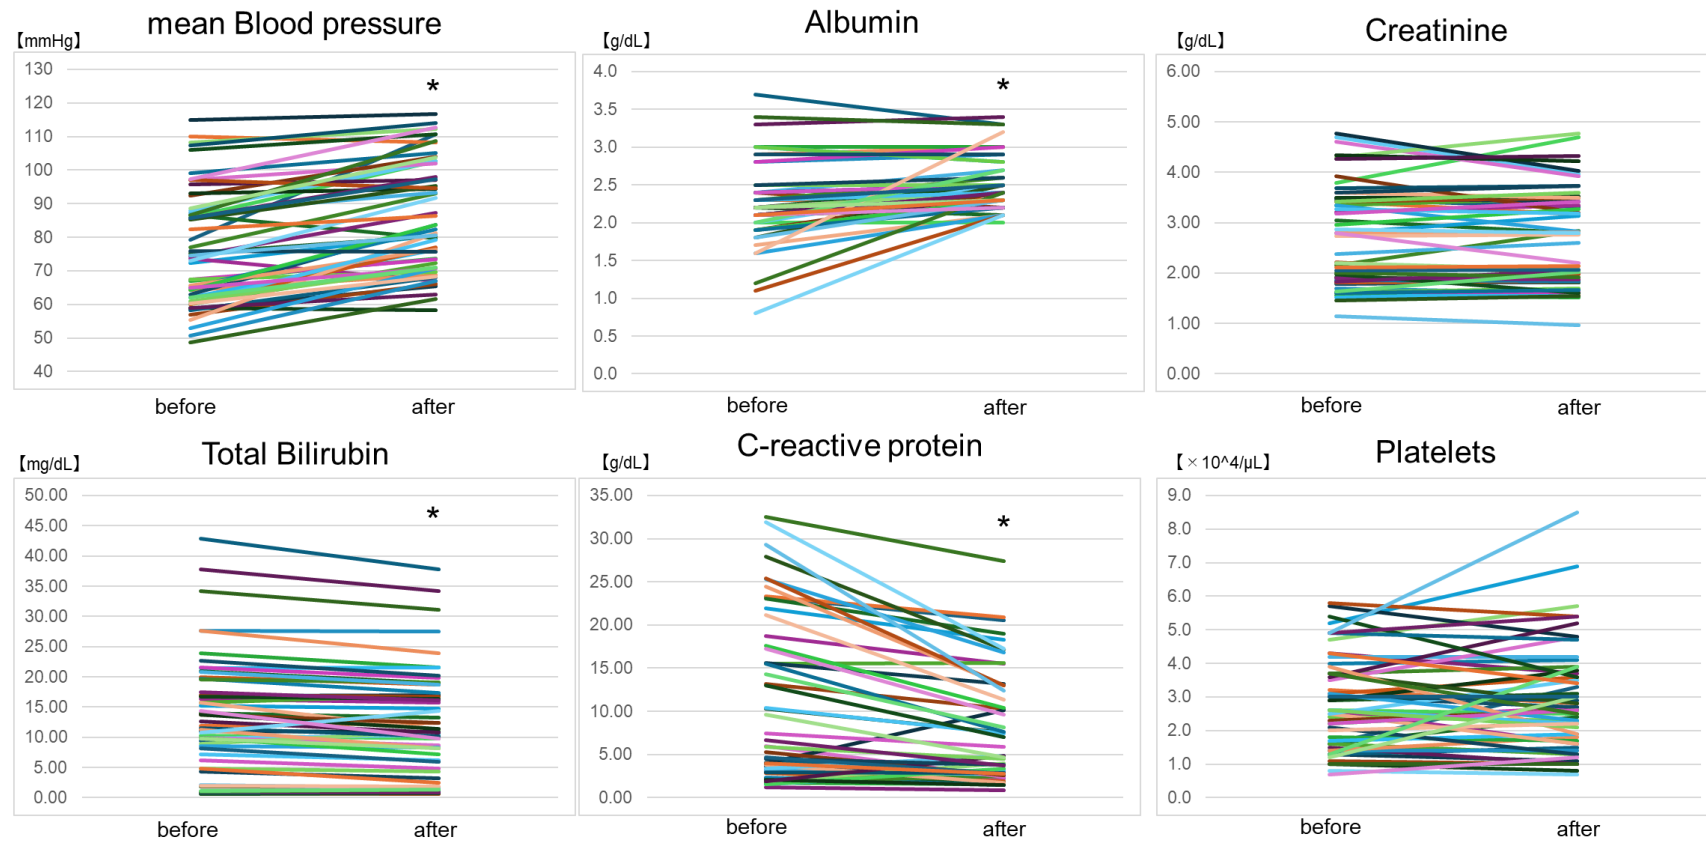

**\*  $p < 0.05$ .**

Supplement: s1 [file s1]
